# Supplementary material for: Local mRNA Delivery from Nanocomposites Made of Gelatin and Hydroxyapatite Nanoparticles
Source: PubMed Central journal article supplement (PMC11440464; doi:10.1021/acsami.4c12721), 2024-09-16
Supplement: am4c12721_si_001.pdf [file am4c12721_si_001.pdf]

## Supporting Information

### Local mRNA delivery from nanocomposites made of gelatin and hydroxyapatite nanoparticles

Lea Andrée<sup>1 †</sup>, Rik Oude Egberink<sup>2 †</sup>, Renée Heesakkers<sup>1</sup>, Ceri-Anne E. Suurmond<sup>1</sup>, Lucas S. Joziase<sup>1</sup>, Masoomeh Khalifeh<sup>2</sup>, Rong Wang<sup>1</sup>, Fang Yang<sup>1</sup>, Roland Brock<sup>2,3 †\*</sup>, Sander C. G. Leeuwenburgh<sup>1 †\*</sup>

<sup>1</sup> Department of Dentistry—Regenerative Biomaterials, Radboud University Medical Center, Philips van Leydenlaan 25, 6525 EX Nijmegen, The Netherlands

<sup>2</sup> Department of Medical BioSciences, Radboud University Medical Center, Geert Grooteplein 28, 6525 GA Nijmegen, The Netherlands

<sup>3</sup> Department of Medical Biochemistry, College of Medicine and Medical Sciences, Arabian Gulf University, Manama 329, Bahrain

† Contributed equally

\* Corresponding authors

Email: sander.leeuwenburgh@radboudumc.nl and roland.brock@radboudumc.nl

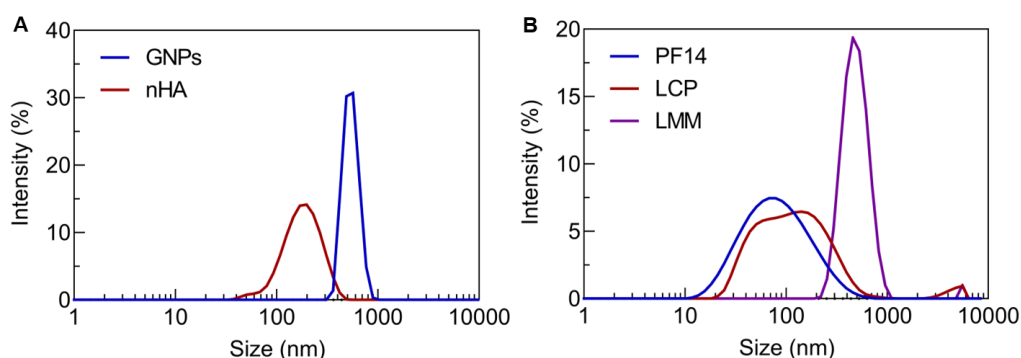

**Figure S1.** Hydrodynamic size distribution of (A) gelatin and hydroxyapatite nanoparticles and (B) mRNA-nanoparticles as measured by dynamic light scattering. PF14 = PepFect 14, LCP = lipid-coated calcium phosphate and LMM = Lipofectamine Messenger Max.

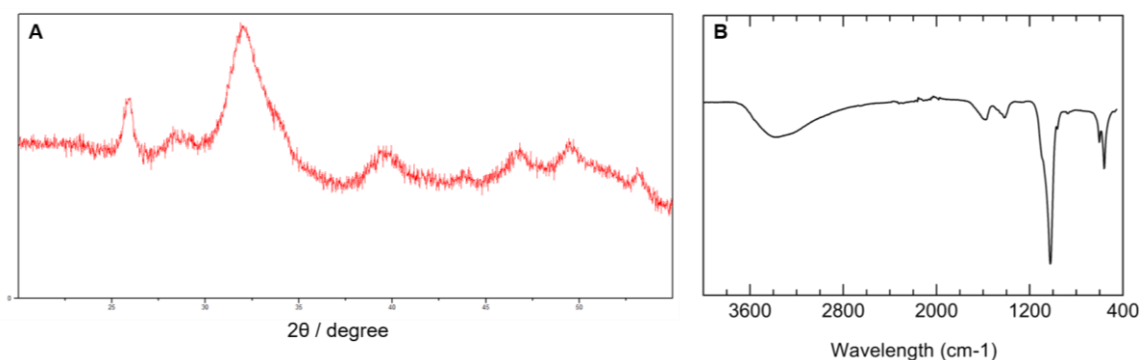

**Figure S2.** Structural analysis of hydroxyapatite nanoparticles by (A) X-ray diffraction and (B) Fourier-transform infrared spectroscopy.

**Table S1.** Hydrogel self-healing after consecutive strain-recovery cycles

| GNP:nHA ratio | 1st recovery (%) | 2nd recovery (%) | 3rd recovery (%) |
|---------------|------------------|------------------|------------------|
| 1:1           | 60 ± 5           | 91 ± 1           | 95 ± 2           |
| 2:1           | 57 ± 16          | 93 ± 3           | 99 ± 5           |
| 4:1           | 67 ± 1           | 95 ± 5           | 98 ± 2           |

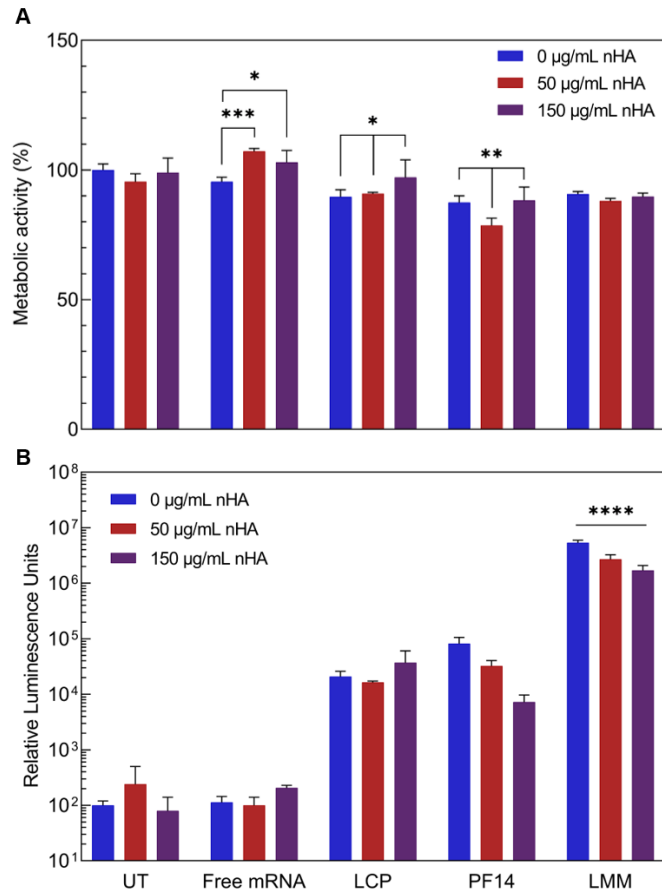

**Figure S3.** Effect of hydroxyapatite nanoparticles on (A) the cytocompatibility and (B) transfection efficiency of mRNA-nanoparticles in hBMSCs. UT = untreated, LCP = lipid-coated calcium phosphate, PF14 = PepFect 14 and LMM = Lipofectamine Messenger Max.
